# Supplementary material
Source: Springer Nature journal article supplement (https://www.springermedizin.de/resource/supplementary/12887_2013_974_MOESM2_ESM.pdf/9476822)

29 children and their parents/caregivers

- aged 4 to 12 years
- with medical diagnosis of ARA

**Test version of CARATkids**

Physician

Psychologist

Children

Parents/Caregivers

Child's version

Caregiver's version

Changes to the test versions

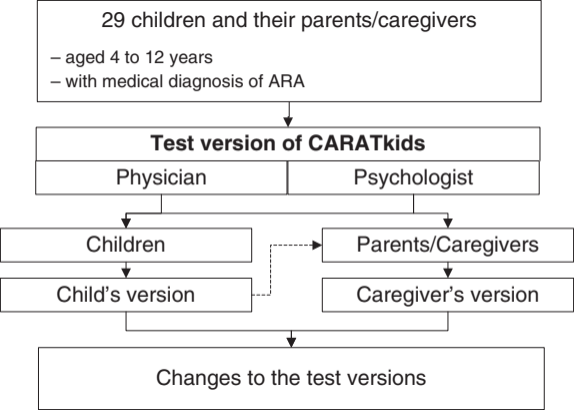

Supplement: MOESM2 [file 9476822]
